# Supplementary material for: Can the thermal expansion be controlled by varying the hydrogen bond dimensionality in polymorphs?
Source: Royal Society of Chemistry journal article supplement (doi:10.1039/c5nj00196j), 2015-01-01
Supplement: c5nj00196j1.pdf [file c5nj00196j1.pdf]

# New Journal of Chemistry

## Supplementary material

### Can the thermal expansion be controlled by varying hydrogen bond dimensionality in polymorphs?

Viswanadha G. Saraswatula, Suman Bhattacharya and Binoy K. Saha \*

Department of Chemistry  
Pondicherry University, Puducherry, India, 605014

#### Contents:

**Figure S1:** Thermal ellipsoid plots of the systems at 50% probability

**Figure S2:** DSC plot of 1D and variation of density, mean  $U_{eq}$  and change in mean  $U_{eq}$  for the systems

**Table S1:** Variable temperature geometry of the hydrogen bonds present in the systems

**Table S2:** Variable temperature geometry of important contacts present in the systems

**Table S3:** Crystallographic parameters for the systems at different temperatures

**Figure S1.** Thermal ellipsoid plots of the system at 50% probability.

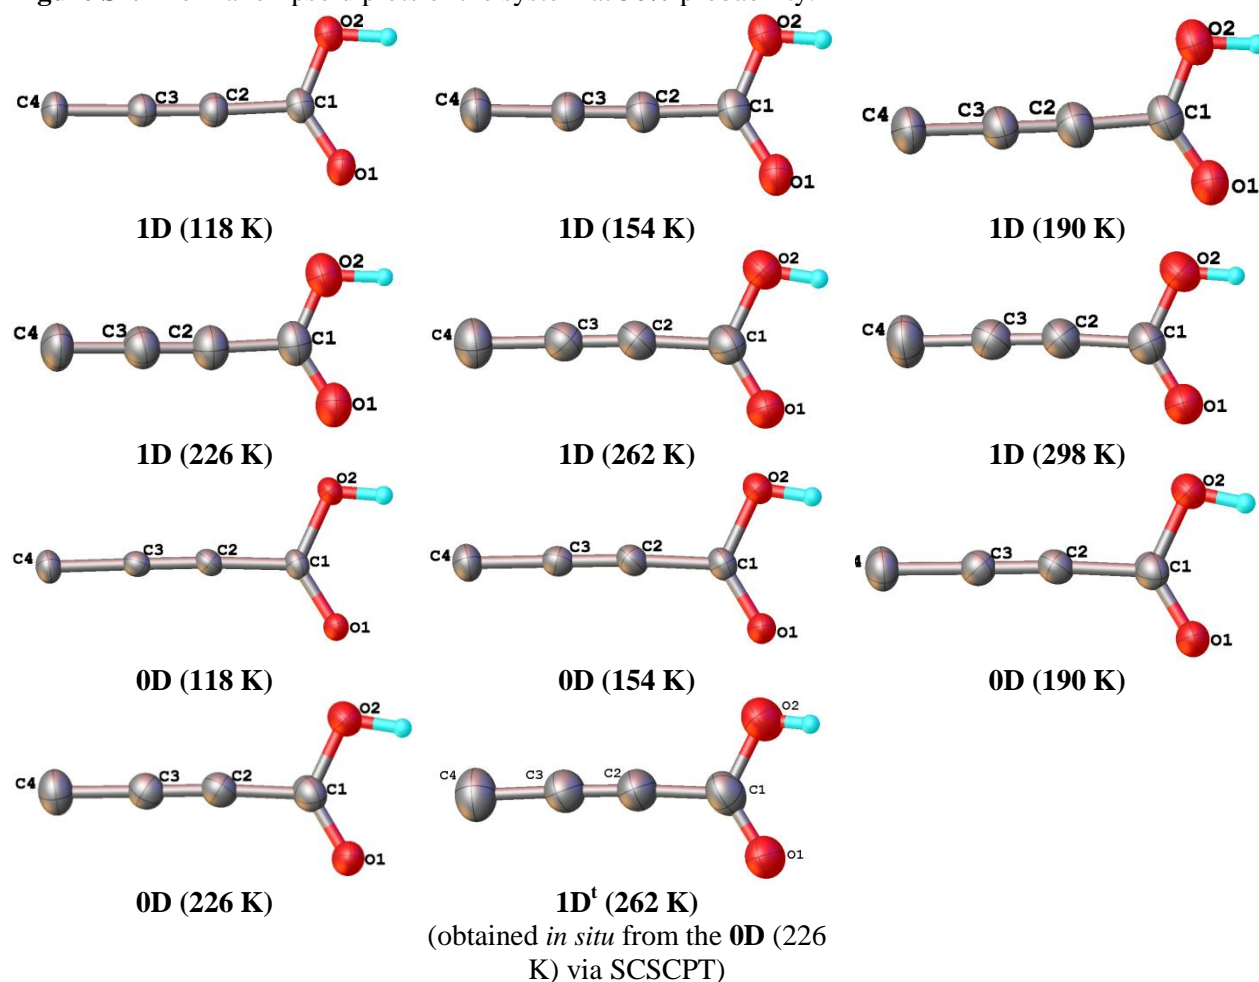

**Figure S2:** DSC plot of 1D and variation of density, mean Ueq and change in mean Ueq for the systems.

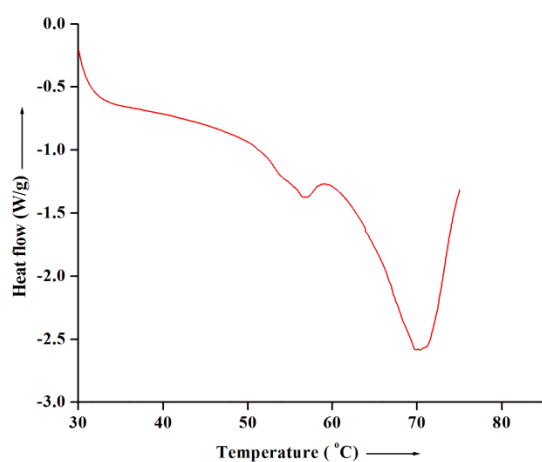

**(a)** DSC plot of the **1D** form of 2-butynoic acid

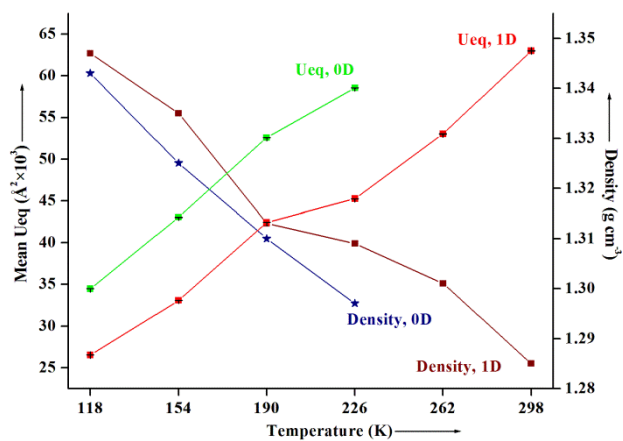

**(b)** Variation of mean Ueq and density of systems at different temperatures.

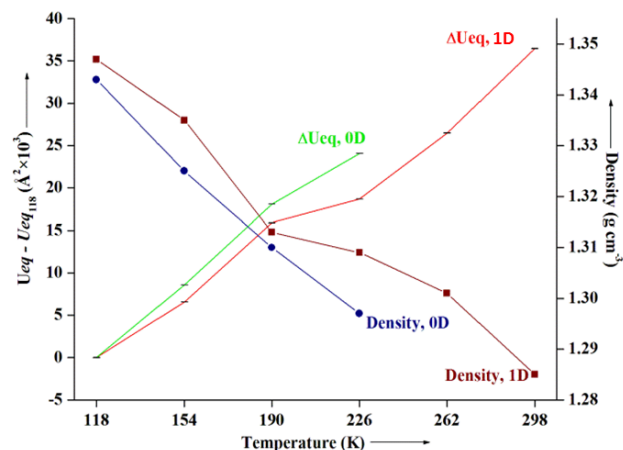

(c) Change in mean  $U_{eq}$  of the systems at different temperatures and respective densities.

| <b>0D</b>             |          |              |              |              |              |                                          |              |
|-----------------------|----------|--------------|--------------|--------------|--------------|------------------------------------------|--------------|
|                       |          | <b>118 K</b> | <b>154 K</b> | <b>190 K</b> | <b>226 K</b> | <b>262 K*</b><br><b>(1D<sup>1</sup>)</b> |              |
| O2–H2···O1            | D-H      | 0.99(4)      | 0.91(3)      | 1.00(5)      | 1.03(5)      | 0.820                                    |              |
|                       | <i>d</i> | 1.66(4)      | 1.74(3)      | 1.66(6)      | 1.61(6)      | 1.888                                    |              |
|                       | <i>D</i> | 2.637(2)     | 2.640(2)     | 2.641(3)     | 2.636(3)     | 2.649(7)                                 |              |
|                       | $\theta$ | 170(4)       | 170(3)       | 168(5)       | 172(5)       | 153.9                                    |              |
| <b>1D</b>             |          |              |              |              |              |                                          |              |
| <b>Hydrogen bonds</b> |          | <b>118 K</b> | <b>154 K</b> | <b>190 K</b> | <b>226 K</b> | <b>262 K</b>                             | <b>298 K</b> |
| O2–H2···O1            | D-H      | 0.88(4)      | 0.88(4)      | 0.88(4)      | 0.93(4)      | 0.91(5)                                  | 0.93(6)      |
|                       | <i>d</i> | 1.79(4)      | 1.80(4)      | 1.84(4)      | 1.76(4)      | 1.78(5)                                  | 1.74(6)      |
|                       | <i>D</i> | 2.641(3)     | 2.641(3)     | 2.654(3)     | 2.649(3)     | 2.648(4)                                 | 2.645(4)     |
|                       | $\theta$ | 164(4)       | 159(4)       | 154(4)       | 158(4)       | 158(4)                                   | 164(5)       |

\* (obtained *in situ* from the **0D** (226 K) via SCSCPT)

| <b>0D</b>                          |                     |              |              |              |              |              |              |
|------------------------------------|---------------------|--------------|--------------|--------------|--------------|--------------|--------------|
| <b>Direction</b>                   | <b>Interactions</b> | <b>118 K</b> | <b>154 K</b> | <b>190 K</b> | <b>226 K</b> |              |              |
| <b>Along X</b><br><b>(Me···Me)</b> | C4···C4             | 3.609(2)     | 3.628(3)     | 3.650(4)     | 3.674(4)     |              |              |
| <b>Along Y</b>                     | C4–H4A···C2         | 3.79(3)      | 3.811(3)     | 3.824(4)     | 3.826(4)     |              |              |
|                                    | C4–H4B···O1         | 3.608(3)     | 3.616(3)     | 3.625(4)     | 3.630(4)     |              |              |
| <b>Along Z</b>                     | C3···O2             | 3.272(3)     | 3.303(3)     | 3.321(4)     | 3.352(4)     |              |              |
|                                    | C1···O1             | 3.173(3)     | 3.197(3)     | 3.223(4)     | 3.246(4)     |              |              |
| <b>1D</b>                          |                     |              |              |              |              |              |              |
|                                    |                     | <b>118 K</b> | <b>154 K</b> | <b>190 K</b> | <b>226 K</b> | <b>262 K</b> | <b>298 K</b> |
| <b>Along Y</b>                     | C3···C4             | 3.520(5)     | 3.538(5)     | 3.564(5)     | 3.579(6)     | 3.582(6)     | 3.600(7)     |
|                                    | C4–H4a···C2         | 3.661(5)     | 3.667(5)     | 3.701(5)     | 3.718(6)     | 3.722(6)     | 3.751(7)     |
|                                    | C4–H4a···O2         | 3.862(4)     | 3.882(4)     | 3.910(5)     | 3.934(5)     | 3.940(6)     | 3.981(6)     |
| <b>Along Z</b>                     | C2···O1             | 3.319(4)     | 3.349(4)     | 3.367(4)     | 3.375(4)     | 3.402(5)     | 3.435(5)     |

**Table S3:** Crystallographic parameters for the systems at different temperatures

| Identification code                                              | 1D (118 K)                                   | 1D (154 K)                                   | 1D (190K)                                    | 1D (226 K)                                   | 1D (262 K)                                   | 1D (298 K)                                   |
|------------------------------------------------------------------|----------------------------------------------|----------------------------------------------|----------------------------------------------|----------------------------------------------|----------------------------------------------|----------------------------------------------|
| Empirical formula                                                | C <sub>4</sub> H <sub>4</sub> O <sub>2</sub> |
| Formula weight                                                   | 84.07                                        | 84.07                                        | 84.07                                        | 84.07                                        | 84.07                                        | 84.07                                        |
| Temperature/K                                                    | 118(2)                                       | 154(2)                                       | 190(2)                                       | 226(2)                                       | 262(2)                                       | 298(2)                                       |
| Crystal system                                                   | monoclinic                                   | monoclinic                                   | monoclinic                                   | monoclinic                                   | monoclinic                                   | monoclinic                                   |
| Space group                                                      | <i>P</i> 2 <sub>1</sub>                      |
| <i>a</i> /Å                                                      | 3.8248(8)                                    | 3.8518(5)                                    | 3.8856(13)                                   | 3.8912(10)                                   | 3.9127(7)                                    | 3.9417(12)                                   |
| <i>b</i> /Å                                                      | 7.0987(7)                                    | 7.0956(5)                                    | 7.1138(12)                                   | 7.1141(12)                                   | 7.1074(8)                                    | 7.1096(18)                                   |
| <i>c</i> /Å                                                      | 7.7801(9)                                    | 7.7924(9)                                    | 7.8353(16)                                   | 7.8453(16)                                   | 7.8489(11)                                   | 7.878(3)                                     |
| $\alpha$ /°                                                      | 90                                           | 90                                           | 90                                           | 90                                           | 90                                           | 90                                           |
| $\beta$ /°                                                       | 101.058(15)                                  | 100.862(12)                                  | 100.93(3)                                    | 100.80(2)                                    | 100.422(16)                                  | 100.25(3)                                    |
| $\gamma$ /°                                                      | 90                                           | 90                                           | 90                                           | 90                                           | 90                                           | 90                                           |
| Volume/Å <sup>3</sup>                                            | 207.32(5)                                    | 209.16(4)                                    | 212.65(9)                                    | 213.32(8)                                    | 214.67(6)                                    | 217.25(12)                                   |
| <i>Z</i>                                                         | 2                                            | 2                                            | 2                                            | 2                                            | 2                                            | 2                                            |
| $\rho_{\text{calc}}$ /g/cm <sup>3</sup>                          | 1.347                                        | 1.335                                        | 1.313                                        | 1.309                                        | 1.301                                        | 1.285                                        |
| $\mu$ /mm <sup>-1</sup>                                          | 0.109                                        | 0.109                                        | 0.107                                        | 0.106                                        | 0.106                                        | 0.104                                        |
| <i>F</i> (000)                                                   | 88                                           | 88                                           | 88                                           | 88                                           | 88                                           | 88                                           |
| Crystal size/mm <sup>3</sup>                                     | 0.36×0.28×0.22                               | 0.36×0.28×0.22                               | 0.36×0.28×0.22                               | 0.36×0.28×0.22                               | 0.36×0.28×0.22                               | 0.36×0.28×0.22                               |
| Reflections collected                                            | 1149                                         | 1275                                         | 1358                                         | 1266                                         | 1284                                         | 1346                                         |
| Independent reflections                                          | 786                                          | 894                                          | 899                                          | 909                                          | 879                                          | 858                                          |
| Parameters                                                       | 60                                           | 60                                           | 60                                           | 60                                           | 60                                           | 61                                           |
| Goodness-of-fit on <i>F</i> <sup>2</sup>                         | 1.09                                         | 1.086                                        | 1.04                                         | 1.044                                        | 1.075                                        | 1.012                                        |
| Final <i>R</i> indexes<br>[ <i>I</i> >= 2 $\sigma$ ( <i>I</i> )] | <i>R</i> <sub>1</sub> = 0.0400               | <i>R</i> <sub>1</sub> = 0.0426               | <i>R</i> <sub>1</sub> = 0.0436               | <i>R</i> <sub>1</sub> = 0.0464               | <i>R</i> <sub>1</sub> = 0.0460               | <i>R</i> <sub>1</sub> = 0.0513               |
| Final <i>R</i> indexes<br>[all data]                             | w <i>R</i> <sub>2</sub> = 0.0973             | w <i>R</i> <sub>2</sub> = 0.1019             | w <i>R</i> <sub>2</sub> = 0.1079             | w <i>R</i> <sub>2</sub> = 0.1123             | w <i>R</i> <sub>2</sub> = 0.1229             | w <i>R</i> <sub>2</sub> = 0.1218             |
| CCDC no.                                                         | 1040242                                      | 1040243                                      | 1040244                                      | 1040245                                      | 1040246                                      | 1040247                                      |

| Identification code                         | 0D (118 K)                                   | 0D (154 K)                                   | 0D (190 K)                                   | 0D (226 K)                                   | 1D <sup>1</sup> (262 K)                      |
|---------------------------------------------|----------------------------------------------|----------------------------------------------|----------------------------------------------|----------------------------------------------|----------------------------------------------|
| Empirical formula                           | C <sub>4</sub> H <sub>4</sub> O <sub>2</sub> |
| Formula weight                              | 84.07                                        | 84.07                                        | 84.07                                        | 84.07                                        | 84.07                                        |
| Temperature/K                               | 118(2)                                       | 154(2)                                       | 190(2)                                       | 226(2)                                       | 262(2)                                       |
| Crystal system                              | triclinic                                    | triclinic                                    | triclinic                                    | triclinic                                    | monoclinic                                   |
| Space group                                 | <i>P</i> $\bar{1}$                           | <i>P</i> $\bar{1}$                           | <i>P</i> $\bar{1}$                           | <i>P</i> $\bar{1}$                           | <i>P</i> 2 <sub>1</sub>                      |
| a/Å                                         | 5.0156(5)                                    | 5.0359(9)                                    | 5.0580(9)                                    | 5.0673(8)                                    | 3.9158(11)                                   |
| b/Å                                         | 6.9262(9)                                    | 6.9758(13)                                   | 7.0169(17)                                   | 7.0638(13)                                   | 7.1104(10)                                   |
| c/Å                                         | 7.0836(8)                                    | 7.1152(13)                                   | 7.1325(15)                                   | 7.1630(9)                                    | 7.871(3)                                     |
| $\alpha$ /°                                 | 112.956(12)                                  | 112.963(18)                                  | 112.92(2)                                    | 113.064(16)                                  | 90                                           |
| $\beta$ /°                                  | 97.227(10)                                   | 97.033(16)                                   | 96.962(17)                                   | 96.689(12)                                   | 100.59(3)                                    |
| $\gamma$ /°                                 | 107.388(11)                                  | 107.706(17)                                  | 108.002(19)                                  | 108.347(15)                                  | 90                                           |
| Volume/Å <sup>3</sup>                       | 207.85(5)                                    | 210.80(8)                                    | 213.14(9)                                    | 215.30(7)                                    | 215.40(10)                                   |
| Z                                           | 2                                            | 2                                            | 2                                            | 2                                            | 2                                            |
| $\rho_{\text{calc}}$ /g/cm <sup>3</sup>     | 1.343                                        | 1.325                                        | 1.31                                         | 1.297                                        | 1.296                                        |
| $\mu$ /mm <sup>-1</sup>                     | 0.109                                        | 0.108                                        | 0.106                                        | 0.105                                        | 0.105                                        |
| F(000)                                      | 88                                           | 88                                           | 88                                           | 88                                           | 88                                           |
| Crystal size/mm <sup>3</sup>                | 0.48×0.38×0.06                               | 0.48×0.38×0.06                               | 0.48×0.38×0.06                               | 0.48×0.38×0.06                               | 0.48×0.38×0.06                               |
| Reflections collected                       | 2333                                         | 2347                                         | 2311                                         | 2279                                         | 1882                                         |
| Independent reflections                     | 980                                          | 976                                          | 996                                          | 997                                          | 939                                          |
| Parameters                                  | 60                                           | 60                                           | 60                                           | 60                                           | 57                                           |
| Goodness-of-fit on F <sup>2</sup>           | 1.052                                        | 1.017                                        | 1.065                                        | 1.081                                        | 1.099                                        |
| Final R indexes [ <i>I</i> ≥2σ( <i>I</i> )] | R <sub>1</sub> = 0.0538                      | R <sub>1</sub> = 0.0575                      | R <sub>1</sub> = 0.0640                      | R <sub>1</sub> = 0.0605                      | R <sub>1</sub> = 0.0633                      |
| Final R indexes [all data]                  | wR <sub>2</sub> = 0.1630                     | wR <sub>2</sub> = 0.1719                     | wR <sub>2</sub> = 0.2136                     | wR <sub>2</sub> = 0.2071                     | wR <sub>2</sub> = 0.1981                     |
| CCDC no.                                    | 1040237                                      | 1040238                                      | 1040239                                      | 1040240                                      | 1040241                                      |
